# Supplementary material for: Effects of drought on nitrogen turnover and abundances of ammonia-oxidizers in mountain grassland
Source: Copernicus journal article supplement (doi:10.5194/bg-11-6003-2014), 2014-11-05
Supplement: Supplementary file 1 [file bg-11-6003-2014-supplement.pdf]

Supplement of Biogeosciences, 11, 6003–6015, 2014  
<http://www.biogeosciences.net/11/6003/2014/>  
doi:10.5194/bg-11-6003-2014-supplement  
© Author(s) 2014. CC Attribution 3.0 License.

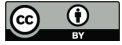

*Supplement of*

## **Effects of drought on nitrogen turnover and abundances of ammonia-oxidizers in mountain grassland**

**L. Fuchslueger et al.**

*Correspondence to:* L. Fuchslueger ([lucia.fuchslueger@univie.ac.at](mailto:lucia.fuchslueger@univie.ac.at)) and E.-M. Kastl ([eva-maria.kastl@helmholtz-muenchen.de](mailto:eva-maria.kastl@helmholtz-muenchen.de))

Supplement

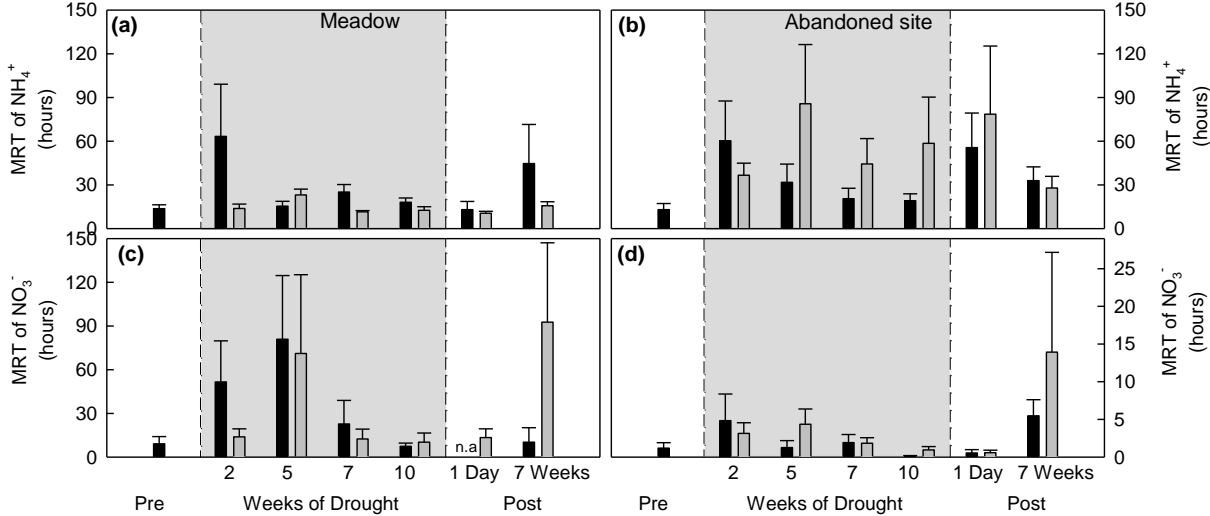

Figure S1. Mean residence times (MRT) of (a, b)  $\text{NH}_4^+$  and (c, d)  $\text{NO}_3^-$  given in hours in soils of the meadow (left panel) and abandoned site (right panel) in control (black bars) and drought plots (grey bars). MRT was calculated by dividing the  $\text{NH}_4^+$  and  $\text{NO}_3^-$  concentration by the respective gross immobilisation rate. The grey background indicates the period of drought treatment. Asterisks mark significant differences between control and drought at single sampling points assessed by t-tests ( $n=4$ , error bars indicate standard error). Note the different scaling of the y-axis in d.
